# Supplementary material
Source: publisher site journal article supplement (https://www.dovepress.com/article/335597)
Supplement: Supplementary file 1 [file get_supplementary_file.php]

**Supplementary Table S1.** ToM performance of two groups

| Characteristics | | Baseline | Week 8 | Week 12 | Week 16 | MD (95%CI) | P | **η2*p* [90% CI]** |
| --- | --- | --- | --- | --- | --- | --- | --- | --- |
| First False Belief Task | Paliperidone | 4.3±0.9 | 4.7±0.9 | 5.1±0.9 | 5.1±0.9 | 4.8(4.6,4.9) | 0.733 | 0.002 [0.000, 0.057] |
| Haloperidol | 4.2±0.8 | 4.5±1.0 | 5.1±0.9 | 5.4±0.9 |
| Second False Belief Task | Paliperidone | 3.5±1.5 | 3.7±1.3 | 4.4±1.1 | 4.7±1.0** | 3.9(3.7,4.1) | 0.064 | 0.058 [0.000, 0.178] |
| Haloperidol | 3.6±0.7 | 3.6±0.8 | 3.8±0.8 | 3.8±0.9 |
| Faux-Pas Task | Paliperidone | 48.8±18.8 | 52.7±21.0 | 59.5±18.3 | 60.2±17.5# | 51.4(48.3,54.5) | 0.016 | 0.097 [0.011, 0.231] |
| Haloperidol | 44.3±12.0 | 46.2±14.9 | 51.3±14.9 | 48.6±18.5 |
| Reading the Mind in the Eyes Test | Paliperidone | 19.0±3.4 | 20.6±3.7 | 20.9±3.6 | 21.8±3.0 | 19.9(19.3,20.6) | 0.081 | 0.052 [0.000, 0.169] |
| Haloperidol | 18.8±3.7 | 19.4±3.4 | 19.8±3.4 | 19.3±4.0 |

Data are shown as mean ± standard deviation (SD).

Participants withdrew due to adverse events, and the numbers of participants in the paliperidone group were 29, 27, 25, and 24 at baseline, week 8, week 12, and week 16, respectively, while the numbers of the haloperidol group were 31, 28, 27, and 25, respectively.

**P<0.001 represented significant differences in performance from baseline to endpoint for the paliperidone group analysed by simple effect analysis, and #P<0.05 represented a significant difference between paliperidone group and haloperdol group at 16th treatment week analysed by t-test.

**Supplementary Table S2.** Comparison of PANSS score in the two groups

| Characteristics | | Baseline | Week 8 | Week 12 | Week 16 | MD (95%CI) | P | **η2*p* [90% CI]** |
| --- | --- | --- | --- | --- | --- | --- | --- | --- |
| PANSS | Paliperidone | 76.2±8.0 | 63.6±8.9 | 56.7±8.6 | 47.1±5.8 | 63.5(61.5,65.1) | 0.395 | 0.012[0.000,0.097] |
| Haloperidol | 75.4±8.0 | 65.5±10.8 | 58.2±4.8 | 49.2±4.7 |

Data are shown as mean ± standard deviation (SD).

PANSS: Positive and Negative Syndrome Scale.

Participants withdrew due to adverse events, and the numbers of participants in the paliperidone group were 29, 27, 25, and 24 at baseline, week 8, week 12, and week 16, respectively, while the numbers of the haloperidol group were 31, 28, 27, and 25, respectively.
